# Supplementary material for: Differential DNA methylation of vocal and facial anatomy genes in modern humans
Source: PubMed Central journal article supplement (PMC7055320; doi:10.1038/s41467-020-15020-6), 2020-03-04
Supplement: 41467_2020_15020_MOESM11_ESM.pdf [file 41467_2020_15020_MOESM11_ESM.pdf]

Corresponding author(s):

YYYY-MM-DD

Last updated by author(s):

## Reporting Summary

Nature Research wishes to improve the reproducibility of the work that we publish. This form provides structure for consistency and transparency in reporting. For further information on Nature Research policies, see [Authors & Referees](#) and the [Editorial Policy Checklist](#).

### Statistics

For all statistical analyses, confirm that the following items are present in the figure legend, table legend, main text, or Methods section.

n/a Confirmed

- |                                     |                                     |                                                                                                                                                                                                                                                            |
|-------------------------------------|-------------------------------------|------------------------------------------------------------------------------------------------------------------------------------------------------------------------------------------------------------------------------------------------------------|
| <input type="checkbox"/>            | <input checked="" type="checkbox"/> | The exact sample size ( $n$ ) for each experimental group/condition, given as a discrete number and unit of measurement                                                                                                                                    |
| <input checked="" type="checkbox"/> | <input type="checkbox"/>            | A statement on whether measurements were taken from distinct samples or whether the same sample was measured repeatedly                                                                                                                                    |
| <input type="checkbox"/>            | <input checked="" type="checkbox"/> | The statistical test(s) used AND whether they are one- or two-sided<br><i>Only common tests should be described solely by name; describe more complex techniques in the Methods section.</i>                                                               |
| <input checked="" type="checkbox"/> | <input type="checkbox"/>            | A description of all covariates tested                                                                                                                                                                                                                     |
| <input type="checkbox"/>            | <input checked="" type="checkbox"/> | A description of any assumptions or corrections, such as tests of normality and adjustment for multiple comparisons                                                                                                                                        |
| <input type="checkbox"/>            | <input checked="" type="checkbox"/> | A full description of the statistical parameters including central tendency (e.g. means) or other basic estimates (e.g. regression coefficient) AND variation (e.g. standard deviation) or associated estimates of uncertainty (e.g. confidence intervals) |
| <input type="checkbox"/>            | <input checked="" type="checkbox"/> | For null hypothesis testing, the test statistic (e.g. $F$ , $t$ , $r$ ) with confidence intervals, effect sizes, degrees of freedom and $P$ value noted<br><i>Give <math>P</math> values as exact values whenever suitable.</i>                            |
| <input checked="" type="checkbox"/> | <input type="checkbox"/>            | For Bayesian analysis, information on the choice of priors and Markov chain Monte Carlo settings                                                                                                                                                           |
| <input checked="" type="checkbox"/> | <input type="checkbox"/>            | For hierarchical and complex designs, identification of the appropriate level for tests and full reporting of outcomes                                                                                                                                     |
| <input type="checkbox"/>            | <input checked="" type="checkbox"/> | Estimates of effect sizes (e.g. Cohen's $d$ , Pearson's $r$ ), indicating how they were calculated                                                                                                                                                         |

*Our web collection on [statistics for biologists](#) contains articles on many of the points above.*

### Software and code

Policy information about [availability of computer code](#)

Data collection

Data collection was of standard BAM files and raw methylation levels

Data analysis

Ancient methylation was computed using RoAM, which was reported in a previous study (Gokhman et al, Science 2014) and is distributed freely from <http://carmelab.huji.ac.il/software.html>

For manuscripts utilizing custom algorithms or software that are central to the research but not yet described in published literature, software must be made available to editors/reviewers. We strongly encourage code deposition in a community repository (e.g. GitHub). See the Nature Research [guidelines for submitting code & software](#) for further information.

### Data

Policy information about [availability of data](#)

All manuscripts must include a [data availability statement](#). This statement should provide the following information, where applicable:

- Accession codes, unique identifiers, or web links for publicly available datasets
- A list of figures that have associated raw data
- A description of any restrictions on data availability

All sequencing and methylation data generated in this work have been deposited in NCBI's Gene Expression Omnibus under GEO accession number GSE96833 [<https://www.ncbi.nlm.nih.gov/geo/query/acc.cgi?acc=GSE96833>]. All other data and materials are contained in the paper and its supplementary information or available upon request.

## Field-specific reporting

Please select the one below that is the best fit for your research. If you are not sure, read the appropriate sections before making your selection.

# Ecological, evolutionary & environmental sciences study design

All studies must disclose on these points even when the disclosure is negative.

|                                   |                                                                                                                              |
|-----------------------------------|------------------------------------------------------------------------------------------------------------------------------|
| Study description                 | Comparative analysis of DNA methylation maps across modern human, archaic humans and chimpanzees                             |
| Research sample                   | DNA methylation in three archaic humans, five ancient anatomically modern humans, 58 modern human bones, and six chimpanzees |
| Sampling strategy                 | All publically available bone DNA methylation maps, all high coverage and UDG treated archaic genomes                        |
| Data collection                   | Most data is publically available. Modern human bones were collected under Helsinki approval #0178-13-HMO                    |
| Timing and spatial scale          | Recent human evolution, roughly the last 600,000 years                                                                       |
| Data exclusions                   | No data were excluded                                                                                                        |
| Reproducibility                   | Not relevant                                                                                                                 |
| Randomization                     | Permutation tests were performed as described in Methods                                                                     |
| Blinding                          | Not relevant                                                                                                                 |
| Did the study involve field work? | <input type="checkbox"/> Yes <input checked="" type="checkbox"/> No                                                          |

## Reporting for specific materials, systems and methods

We require information from authors about some types of materials, experimental systems and methods used in many studies. Here, indicate whether each material, system or method listed is relevant to your study. If you are not sure if a list item applies to your research, read the appropriate section before selecting a response.

### Materials & experimental systems

|                                     |                                                                 |
|-------------------------------------|-----------------------------------------------------------------|
| n/a                                 | Included in the study                                           |
| <input checked="" type="checkbox"/> | <input type="checkbox"/> Antibodies                             |
| <input checked="" type="checkbox"/> | <input type="checkbox"/> Eukaryotic cell lines                  |
| <input checked="" type="checkbox"/> | <input type="checkbox"/> Palaeontology                          |
| <input type="checkbox"/>            | <input checked="" type="checkbox"/> Animals and other organisms |
| <input type="checkbox"/>            | <input checked="" type="checkbox"/> Human research participants |
| <input checked="" type="checkbox"/> | <input type="checkbox"/> Clinical data                          |

### Methods

|                                     |                                                 |
|-------------------------------------|-------------------------------------------------|
| n/a                                 | Included in the study                           |
| <input checked="" type="checkbox"/> | <input type="checkbox"/> ChIP-seq               |
| <input checked="" type="checkbox"/> | <input type="checkbox"/> Flow cytometry         |
| <input checked="" type="checkbox"/> | <input type="checkbox"/> MRI-based neuroimaging |

## Animals and other organisms

Policy information about [studies involving animals](#); [ARRIVE guidelines](#) recommended for reporting animal research

|                         |                                                                                                                                                                                                                                                                                                                                                                                                                                                                     |
|-------------------------|---------------------------------------------------------------------------------------------------------------------------------------------------------------------------------------------------------------------------------------------------------------------------------------------------------------------------------------------------------------------------------------------------------------------------------------------------------------------|
| Laboratory animals      | None                                                                                                                                                                                                                                                                                                                                                                                                                                                                |
| Wild animals            | We used bones of deceased chimpanzees. This includes a 47-year-old female chimpanzee provided from the Biobank of the Biomedical Primate Research Centre (BPRC) in the Netherlands, a newborn wild chimpanzee infant who died during a documented infanticide event at Gombe National Park on 9 March 2012, and four chimpanzee cadavers from captive colonies at the Southwest National Primate Research Center in Texas, USA. All this is described in the paper. |
| Field-collected samples | See above                                                                                                                                                                                                                                                                                                                                                                                                                                                           |
| Ethics oversight        | None                                                                                                                                                                                                                                                                                                                                                                                                                                                                |

Note that full information on the approval of the study protocol must also be provided in the manuscript.

## Human research participants

Policy information about [studies involving human research participants](#)

|                            |                                             |
|----------------------------|---------------------------------------------|
| Population characteristics | Standard knee and hip replacement surgeries |
| Recruitment                | Only signed consent                         |

## Ethics oversight

Helsinki approval #0178-13-HMO

Note that full information on the approval of the study protocol must also be provided in the manuscript.
